# Supplementary material for: Relationship between the severity of agitation and quality of life in residents with dementia living in German nursing homes - a secondary data analysis
Source: Springer Nature journal article supplement (doi:10.1186/s12888-021-03167-5), 2021-04-13

# Distribution of Propensity Scores

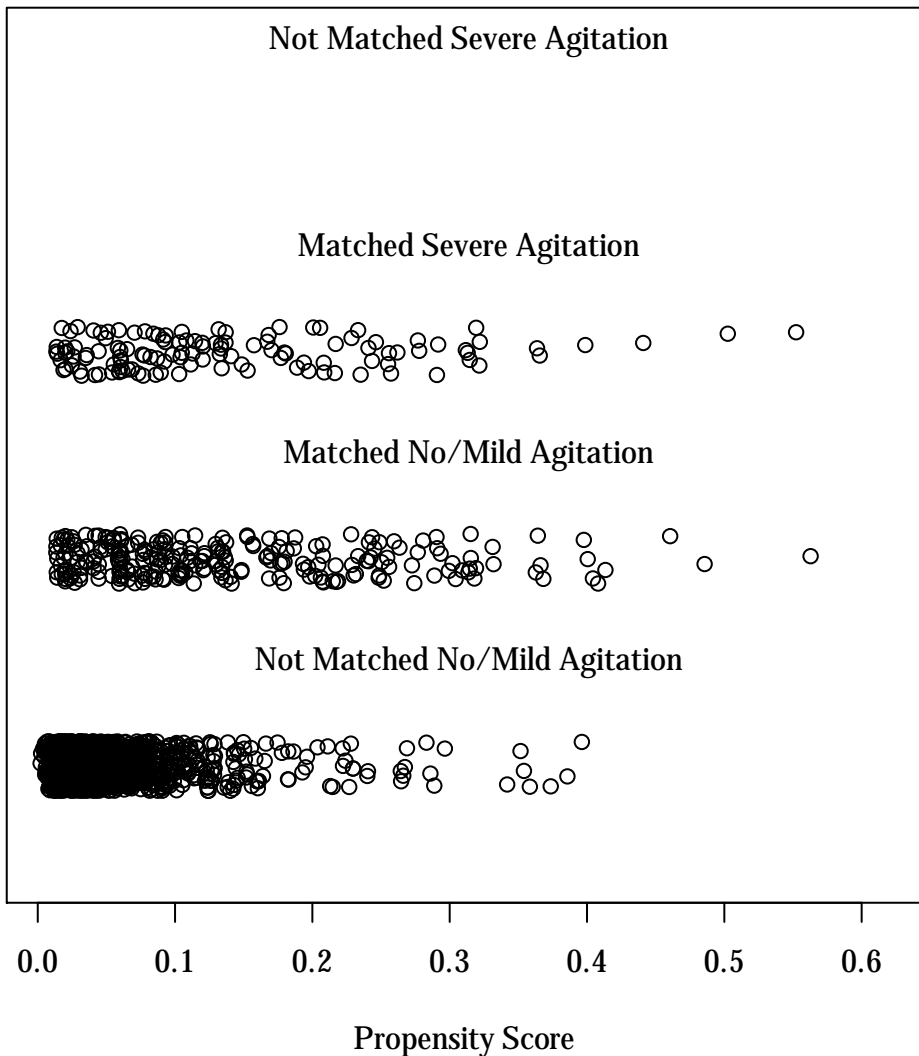

Supplement: MOESM1 [file 19069682]
