# Supplementary material for: Relationship between the severity of agitation and quality of life in residents with dementia living in German nursing homes - a secondary data analysis
Source: Springer Nature journal article supplement (doi:10.1186/s12888-021-03167-5), 2021-04-13

# Density of Propensity Scores after matching

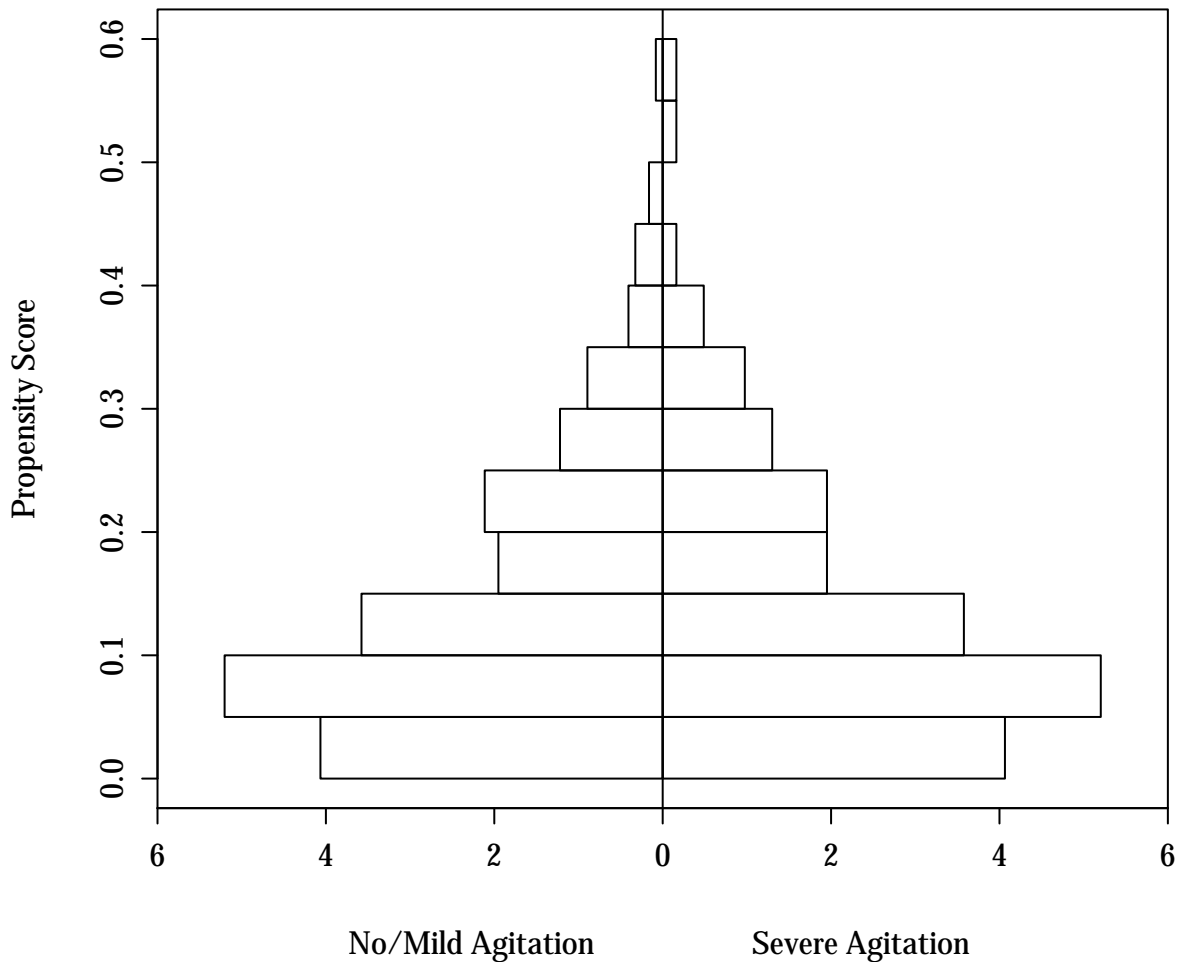

Supplement: MOESM3 [file 19069682]
