# Supplementary material for: Relationship between the severity of agitation and quality of life in residents with dementia living in German nursing homes - a secondary data analysis
Source: Springer Nature journal article supplement (doi:10.1186/s12888-021-03167-5), 2021-04-13
Supplement: MOESM4 [file 19069682]

#### Additional file 4: Mixed linear regression models with all coefficients

**Table S1** Mixed linear regression model for dimension *positive affect* as dependent variable, the severity of agitation and the matching variables as fixed factors and care units nested in nursing homes as random factor

| Independent Variables (fixed effects) | Coefficients | 95% CI              | SE          | t            | p                |
|---------------------------------------|--------------|---------------------|-------------|--------------|------------------|
| <b>(Intercept)</b>                    | <b>9.81</b>  | <b>7.06, 12.59</b>  | <b>1.42</b> | <b>6.90</b>  | <b>&lt;0.001</b> |
| <b>Severe Agitation (yes)</b>         | <b>-1.68</b> | <b>-2.28, -1.09</b> | <b>0.31</b> | <b>-5.51</b> | <b>&lt;0.001</b> |
| Age                                   | 0.01         | -0.03, 0.04         | 0.02        | 0.29         | 0.775            |
| Sex (female)                          | -0.32        | -0.94, 0.29         | 0.31        | -1.04        | 0.301            |
| Visits (no)                           | -0.53        | -1.68, 0.62         | 0.59        | -0.90        | 0.371            |
| DSS score                             | -0.14        | -0.24, -0.04        | 0.05        | -2.80        | 0.005            |
| Duration of stay                      | 0.01         | <-0.01, 0.01        | 0.01        | 1.20         | 0.232            |
| NPI-Q Delusions (no)                  | 0.12         | -0.46, 0.71         | 0.30        | 0.41         | 0.683            |
| NPI-Q Anxiety (no)                    | -0.21        | -0.80, 0.38         | 0.30        | -0.69        | 0.492            |
| NPI-Q Aberrant Motor (no)             | -0.66        | -1.31, -0.03        | 0.33        | -2.03        | 0.043            |
| NPI-Q Hallucinations (no)             | 0.43         | -0.24, 1.10         | 0.34        | 1.26         | 0.208            |

Random effects: Care unit (intercept): Variance = 0.59; SD = 0.77; .sig01 = 0.00, 1.46;

Nursing home (intercept): Variance = 0.56; SD = 0.75; .sig02 = 0.00, 1.29;

Residual: Variance = 6.18; SD = 2.49; .sigma = 2.25, 2.68;

Number of obs.: 369, Care units: 115; Nursing homes: 64

**Table S2** Mixed linear regression model for dimension *negative affect* as dependent variable, the severity of agitation and the matching variables as fixed factors and care units nested in nursing homes as random factor

| Independent Variables (fixed effects) | Coefficients | 95% CI              | SE          | t            | p                |
|---------------------------------------|--------------|---------------------|-------------|--------------|------------------|
| <b>(Intercept)</b>                    | <b>2.78</b>  | <b>1.27, 4.29</b>   | <b>0.78</b> | <b>3.58</b>  | <b>&lt;0.001</b> |
| Severe Agitation (yes)                | -0.30        | -0.63, 0.03         | 0.17        | -1.78        | 0.075            |
| Age                                   | 0.02         | <0.01, 0.04         | 0.01        | 2.01         | 0.045            |
| <b>Sex (female)</b>                   | <b>-0.86</b> | <b>-1.19, -0.53</b> | <b>0.17</b> | <b>-5.08</b> | <b>&lt;0.001</b> |
| Visits (no)                           | 0.44         | -0.20, 1.07         | 0.33        | 1.34         | 0.182            |
| DSS score                             | -0.03        | -0.09, 0.02         | 0.03        | -1.21        | 0.227            |
| Duration of stay                      | <-0.01       | -0.01, <0.01        | <0.01       | -0.60        | 0.549            |
| NPI-Q Delusions (no)                  | 0.12         | -0.20, 0.44         | 0.17        | 0.71         | 0.478            |
| <b>NPI-Q Anxiety (no)</b>             | <b>1.23</b>  | <b>0.91, 1.55</b>   | <b>0.16</b> | <b>7.49</b>  | <b>&lt;0.001</b> |
| NPI-Q Aberrant Motor (no)             | -0.10        | -0.45, 0.24         | 0.18        | -0.58        | 0.562            |
| NPI-Q Hallucinations (no)             | 0.35         | -0.01, 0.72         | 0.19        | 1.88         | 0.062            |

Random effects: Care unit (intercept): Variance = 0.08; SD = 0.27; .sig01 = 0.00, 0.68;

Nursing home (intercept): Variance = 0.43; SD = 0.66; .sig02 = 0.27, 0.91;

Residual: Variance = 1.80; SD = 1.34; .sigma = 1.22, 1.44;

Number of obs.: 369, Care units: 115; Nursing homes: 64

**Table S3** Mixed linear regression model for dimension *restless tense behaviour* as dependent variable, the severity of agitation and the matching variables as fixed factors and care units nested in nursing homes as random factor

| Independent Variables (fixed effects) | Coefficients | 95% CI              | SE          | t            | p                |
|---------------------------------------|--------------|---------------------|-------------|--------------|------------------|
| (Intercept)                           | 2.33         | -0.04, 4.72         | 1.22        | 1.91         | 0.057            |
| <b>Severe Agitation (yes)</b>         | <b>-1.52</b> | <b>-2.04, -1.00</b> | <b>0.27</b> | <b>-5.72</b> | <b>&lt;0.001</b> |
| Age                                   | 0.02         | -0.01, 0.05         | 0.01        | 1.31         | 0.191            |
| Sex (female)                          | 0.58         | 0.06, 1.11          | 0.27        | 2.18         | 0.030            |
| Visits (no)                           | 0.22         | -0.76, 1.20         | 0.50        | 0.43         | 0.670            |
| <b>DSS score</b>                      | <b>-0.13</b> | <b>-0.22, -0.05</b> | <b>0.04</b> | <b>-3.10</b> | <b>0.002</b>     |
| Duration of stay                      | <0.01        | <-0.01, 0.01        | <0.01       | 0.97         | 0.331            |
| NPI-Q Delusions (no)                  | 0.10         | -0.40, 0.60         | 0.26        | 0.40         | 0.692            |

| Independent Variables (fixed effects) | Coefficients | 95% CI            | SE          | t           | p                |
|---------------------------------------|--------------|-------------------|-------------|-------------|------------------|
| <b>NPI-Q Anxiety (no)</b>             | <b>1.11</b>  | <b>0.60, 1.62</b> | <b>0.26</b> | <b>4.26</b> | <b>&lt;0.001</b> |
| <b>NPI-Q Aberrant Motor (no)</b>      | <b>1.73</b>  | <b>1.19, 2.28</b> | <b>0.28</b> | <b>6.17</b> | <b>&lt;0.001</b> |
| NPI-Q Hallucinations (no)             | 0.11         | -0.46, 0.69       | 0.30        | 0.38        | 0.704            |

Random effects: Care unit (intercept): Variance = 1.15; SD = 1.07; .sig01 = 0.58, 1.52;  
Nursing home (intercept): Variance = 0.29; SD = 0.54; .sig02 = 0.00, 1.12;  
Residual: Variance = 4.31; SD = 2.08; .sigma = 1.88, 2.23;  
Number of obs.: 369, Care units: 115; Nursing homes: 64

**Table S4** Mixed linear regression model for dimension *social relations* as dependent variable, the severity of agitation and the matching variables as fixed factors and care units nested in nursing homes as random factor

| Independent Variables (fixed effects) | Coefficients | 95% CI              | SE          | t            | p                |
|---------------------------------------|--------------|---------------------|-------------|--------------|------------------|
| <b>(Intercept)</b>                    | <b>6.57</b>  | <b>4.66, 8.50</b>   | <b>0.99</b> | <b>6.65</b>  | <b>&lt;0.001</b> |
| <b>Severe Agitation (yes)</b>         | <b>-1.12</b> | <b>-1.54, -0.71</b> | <b>0.21</b> | <b>-5.28</b> | <b>&lt;0.001</b> |
| Age                                   | <0.01        | -0.02, 0.03         | 0.01        | 0.27         | 0.790            |
| Sex (female)                          | 0.28         | -0.14, 0.70         | 0.22        | 1.29         | 0.197            |
| Visits (no)                           | -0.49        | -1.29, 0.31         | 0.41        | -1.18        | 0.239            |
| DSS score                             | 0.01         | -0.06, 0.07         | 0.03        | 0.14         | 0.890            |
| Duration of stay                      | 0.01         | <-0.01, 0.01        | <0.01       | 1.64         | 0.101            |
| NPI-Q Delusions (no)                  | -0.06        | -0.47, 0.35         | 0.21        | -0.27        | 0.784            |
| NPI-Q Anxiety (no)                    | -0.56        | -0.97, -0.15        | 0.21        | -2.68        | 0.008            |
| NPI-Q Aberrant Motor (no)             | -0.53        | -0.97, -0.09        | 0.23        | -2.34        | 0.020            |
| NPI-Q Hallucinations (no)             | 0.59         | 0.13, 1.05          | 0.24        | 2.47         | 0.014            |

Random effects: Care unit (intercept): Variance = 0.25; SD = 0.50; .sig01 = 0.00, 0.99;  
Nursing home (intercept): Variance = 0.23; SD = 0.48; .sig02 = 0.00, 0.94;  
Residual: Variance = 3.02; SD = 1.74; .sigma = 1.57, 1.87;  
Number of obs.: 369, Care units: 115; Nursing homes: 64

**Table S5** Mixed linear regression model for dimension *social isolation* as dependent variable, the severity of agitation and the matching variables as fixed factors and care units nested in nursing homes as random factor

| Independent Variables (fixed effects) | Coefficients | 95% CI              | SE          | t            | p                |
|---------------------------------------|--------------|---------------------|-------------|--------------|------------------|
| <b>(Intercept)</b>                    | <b>7.65</b>  | <b>5.37, 9.94</b>   | <b>1.18</b> | <b>6.50</b>  | <b>&lt;0.001</b> |
| <b>Severe Agitation (yes)</b>         | <b>-2.07</b> | <b>-2.57, -1.57</b> | <b>0.25</b> | <b>-8.14</b> | <b>&lt;0.001</b> |
| Age                                   | -0.02        | -0.05, <0.01        | 0.01        | -1.72        | 0.086            |
| Sex (female)                          | 0.13         | -0.37, 0.63         | 0.26        | 0.50         | 0.618            |
| Visits (no)                           | 0.27         | -0.67, 1.22         | 0.49        | 0.56         | 0.575            |
| DSS score                             | -0.05        | -0.13, 0.03         | 0.04        | -1.18        | 0.238            |
| Duration of stay                      | <0.01        | -0.01, 0.01         | <0.01       | 0.24         | 0.813            |
| NPI-Q Delusions (no)                  | 0.45         | -0.04, 0.94         | 0.25        | 1.80         | 0.072            |
| NPI-Q Anxiety (no)                    | 0.69         | 0.21, 1.18          | 0.25        | 2.77         | 0.006            |
| NPI-Q Aberrant Motor (no)             | 0.37         | -0.15, 0.90         | 0.27        | 1.38         | 0.168            |
| NPI-Q Hallucinations (no)             | 0.38         | -0.17, 0.93         | 0.29        | 1.34         | 0.180            |

Random effects: Care unit (intercept): Variance = 0.48; SD = 0.70; .sig01 = 0.00, 1.24;  
Nursing home (intercept): Variance = 0.50; SD = 0.71; .sig02 = 0.00, 1.15;  
Residual: Variance = 4.14; SD = 2.04; .sigma = 1.85, 2.19;  
Number of obs.: 369, Care units: 115; Nursing homes: 64
