# Supplementary material for: Relationship between the severity of agitation and quality of life in residents with dementia living in German nursing homes - a secondary data analysis
Source: Springer Nature journal article supplement (doi:10.1186/s12888-021-03167-5), 2021-04-13
Supplement: MOESM5 [file 19069682]

## Additional file 5: Mixed linear regression models with the single NPI-Q items defining the construct of agitation

**Table S1** Mixed linear regression model for dimension *positive affect* as dependent variable, the severity of each NPI-Q item defining the construct of agitation and the matching variables as fixed factors and care units nested in nursing homes as random factor

| Independent Variables (fixed effects)           | Coefficients | 95% CI              | SE          | t            | p                |
|-------------------------------------------------|--------------|---------------------|-------------|--------------|------------------|
| <b>(Intercept)</b>                              | <b>9.64</b>  | <b>6.91, 12.40</b>  | <b>1.42</b> | <b>6.80</b>  | <b>&lt;0.001</b> |
| <b>NPI-Q Severe Agitation/Aggression (yes)</b>  | <b>-1.53</b> | <b>-2.24, -0.83</b> | <b>0.36</b> | <b>-4.20</b> | <b>&lt;0.001</b> |
| NPI-Q Severe Disinhibition (yes)                | -0.28        | -1.23, 0.68         | 0.49        | -0.56        | 0.575            |
| <b>NPI-Q Severe Irritability/Lability (yes)</b> | <b>-1.36</b> | <b>-2.16, -0.55</b> | <b>0.42</b> | <b>-3.24</b> | <b>0.001</b>     |
| Age                                             | 0.01         | -0.03, 0.04         | 0.02        | 0.45         | 0.654            |
| Sex (female)                                    | -0.36        | -0.97, 0.25         | 0.31        | -1.16        | 0.246            |
| Visits (no)                                     | -0.71        | -1.87, 0.44         | 0.60        | -1.19        | 0.234            |
| DSS score                                       | -0.14        | -0.24, -0.04        | 0.05        | -2.61        | 0.009            |
| Duration of stay                                | 0.01         | -0.01, 0.01         | 0.01        | 0.97         | 0.333            |
| NPI-Q Delusions (no)                            | -0.02        | -0.60, 0.57         | 0.30        | -0.05        | 0.960            |
| NPI-Q Anxiety (no)                              | -0.24        | -0.82, 0.34         | 0.30        | -0.79        | 0.430            |
| NPI-Q Aberrant Motor (no)                       | -0.70        | -1.34, -0.07        | 0.33        | -2.16        | 0.031            |
| NPI-Q Hallucinations (no)                       | 0.49         | -0.18, 1.51         | 0.34        | 1.43         | 0.153            |

Random effects: Care unit (intercept): Variance = 0.41; SD = 0.64; .sig01 = 0.00, 1.38;  
Nursing home (intercept): Variance = 0.63; SD = 0.80; .sig02 = 0.00, 1.31;  
Residual: Variance = 6.17; SD = 2.48; .sigma = 2.24, 2.67;  
Number of obs.: 369, Care units: 115; Nursing homes: 64

**Table S2** Mixed linear regression model for dimension *negative affect* as dependent variable, the severity of each NPI-Q item defining the construct of agitation and the matching variables as fixed factors and care units nested in nursing homes as random factor

| Independent Variables (fixed effects)    | Coefficients | 95% CI              | SE          | t            | p                |
|------------------------------------------|--------------|---------------------|-------------|--------------|------------------|
| <b>(Intercept)</b>                       | <b>2.73</b>  | <b>1.22, 4.25</b>   | <b>0.78</b> | <b>3.50</b>  | <b>&lt;0.001</b> |
| NPI-Q Severe Agitation/Aggression (yes)  | -0.20        | -0.59, 0.19         | 0.20        | -1.00        | 0.317            |
| NPI-Q Severe Disinhibition (yes)         | -0.08        | -0.61, 0.45         | 0.27        | -0.30        | 0.761            |
| NPI-Q Severe Irritability/Lability (yes) | -0.08        | -0.53, 0.37         | 0.23        | -0.35        | 0.730            |
| Age                                      | 0.02         | <0.01, 0.04         | 0.01        | 1.97         | 0.050            |
| <b>Sex (female)</b>                      | <b>-0.86</b> | <b>-1.19, -0.53</b> | <b>0.17</b> | <b>-5.07</b> | <b>&lt;0.001</b> |
| Visits (no)                              | 0.43         | -0.21, 1.07         | 0.33        | 1.30         | 0.196            |
| DSS score                                | -0.03        | -0.09, 0.02         | 0.03        | -1.08        | 0.281            |
| Duration of stay                         | <-0.01       | -0.01, <0.01        | <0.01       | -0.64        | 0.522            |
| NPI-Q Delusions (no)                     | 0.10         | -0.23, 0.42         | 0.17        | 0.59         | 0.556            |
| <b>NPI-Q Anxiety (no)</b>                | <b>1.23</b>  | <b>0.91, 1.55</b>   | <b>0.17</b> | <b>7.42</b>  | <b>&lt;0.001</b> |
| NPI-Q Aberrant Motor (no)                | -0.11        | -0.46, 0.24         | 0.18        | -0.61        | 0.546            |
| NPI-Q Hallucinations (no)                | 0.37         | <0.01, 0.73         | 0.19        | 1.95         | 0.052            |

Random effects: Care unit (intercept): Variance = 0.06; SD = 0.25; .sig01 = 0.00, 0.67;  
Nursing home (intercept): Variance = 0.45; SD = 0.67; .sig02 = 0.29, 0.93;  
Residual: Variance = 1.82; SD = 1.35; .sigma = 1.22, 1.44;  
Number of obs.: 369, Care units: 115; Nursing homes: 64

**Table S3** Mixed linear regression model for dimension *restless tense behaviour* as dependent variable, the severity of each NPI-Q item defining the construct of agitation and the matching variables as fixed factors and care units nested in nursing homes as random factor

| Independent Variables (fixed effects)          | Coefficients | 95% CI              | SE          | t            | p                |
|------------------------------------------------|--------------|---------------------|-------------|--------------|------------------|
| (Intercept)                                    | 2.15         | -0.25, 4.56         | 1.24        | 1.73         | 0.084            |
| <b>NPI-Q Severe Agitation/Aggression (yes)</b> | <b>-1.21</b> | <b>-1.83, -0.59</b> | <b>0.32</b> | <b>-3.79</b> | <b>&lt;0.001</b> |
| NPI-Q Severe Disinhibition (yes)               | -0.47        | -1.30, 0.37         | 0.43        | -1.08        | 0.282            |
| NPI-Q Severe Irritability/Lability (yes)       | -0.74        | -1.46, -0.04        | 0.36        | -2.04        | 0.042            |
| Age                                            | 0.02         | -0.01, 0.05         | 0.01        | 1.33         | 0.184            |

| Independent Variables (fixed effects) | Coefficients | 95% CI            | SE          | t           | p                |
|---------------------------------------|--------------|-------------------|-------------|-------------|------------------|
| Sex (female)                          | 0.56         | 0.04, 1.09        | 0.27        | 2.07        | 0.040            |
| Visits (no)                           | 0.14         | -0.86, 1.15       | 0.52        | 0.28        | 0.781            |
| DSS score                             | -0.12        | -0.21, -0.04      | 0.05        | -2.75       | 0.006            |
| Duration of stay                      | <0.01        | -0.01, 0.01       | <0.01       | 0.74        | 0.460            |
| NPI-Q Delusions (no)                  | -0.01        | -0.52, 0.50       | 0.26        | -0.03       | 0.973            |
| <b>NPI-Q Anxiety (no)</b>             | <b>1.09</b>  | <b>0.58, 1.61</b> | <b>0.26</b> | <b>4.13</b> | <b>&lt;0.001</b> |
| <b>NPI-Q Aberrant Motor (no)</b>      | <b>1.70</b>  | <b>1.14, 2.25</b> | <b>0.29</b> | <b>5.94</b> | <b>&lt;0.001</b> |
| NPI-Q Hallucinations (no)             | 0.17         | -0.40, 0.75       | 0.30        | 0.58        | 0.561            |

Random effects: Care unit (intercept): Variance = 0.96; SD = 0.98; .sig01 = 0.45, 1.46;  
Nursing home (intercept): Variance = 0.37; SD = 0.61; .sig02 = 0.00, 1.16;  
Residual: Variance = 4.48; SD = 2.12; .sigma = 1.91, 2.27;  
Number of obs.: 369, Care units: 115; Nursing homes: 64

**Table S4** Mixed linear regression model for dimension *social relations* as dependent variable, the severity of each NPI-Q item defining the construct of agitation and the matching variables as fixed factors and care units nested in nursing homes as random factor

| Independent Variables (fixed effects)           | Coefficients | 95% CI              | SE          | t            | p                |
|-------------------------------------------------|--------------|---------------------|-------------|--------------|------------------|
| <b>(Intercept)</b>                              | <b>6.37</b>  | <b>4.48, 8.27</b>   | <b>0.98</b> | <b>6.50</b>  | <b>&lt;0.001</b> |
| <b>NPI-Q Severe Agitation/Aggression (yes)</b>  | <b>-1.02</b> | <b>-1.51, -0.53</b> | <b>0.25</b> | <b>-4.03</b> | <b>&lt;0.001</b> |
| NPI-Q Severe Disinhibition (yes)                | 0.30         | -0.36, 0.96         | 0.34        | 0.87         | 0.384            |
| <b>NPI-Q Severe Irritability/Lability (yes)</b> | <b>-1.12</b> | <b>-1.68, -0.56</b> | <b>0.29</b> | <b>-3.87</b> | <b>&lt;0.001</b> |
| Age                                             | 0.01         | -0.02, 0.03         | 0.01        | 0.59         | 0.558            |
| Sex (female)                                    | 0.25         | -0.17, 0.66         | 0.22        | 1.15         | 0.249            |
| Visits (no)                                     | -0.68        | -1.48, 0.12         | 0.41        | -1.65        | 0.101            |
| DSS score                                       | <0.01        | -0.07, 0.07         | 0.04        | 0.04         | 0.970            |
| Duration of stay                                | 0.01         | <-0.01, 0.01        | <0.01       | 1.40         | 0.164            |
| NPI-Q Delusions (no)                            | -0.13        | -0.54, 0.28         | 0.21        | -0.63        | 0.529            |
| <b>NPI-Q Anxiety (no)</b>                       | <b>-0.61</b> | <b>-1.01, -0.21</b> | <b>0.21</b> | <b>-2.93</b> | <b>0.004</b>     |
| NPI-Q Aberrant Motor (no)                       | -0.59        | -1.02, -0.14        | 0.23        | -2.60        | 0.010            |
| NPI-Q Hallucinations (no)                       | 0.64         | 0.19, 1.10          | 0.24        | 2.72         | 0.007            |

Random effects: Care unit (intercept): Variance = 0.10; SD = 0.32; .sig01 = 0.00, 0.93;  
Nursing home (intercept): Variance = 0.36; SD = 0.60; .sig02 = 0.00, 0.96;  
Residual: Variance = 2.98; SD = 1.73; .sigma = 1.56, 1.85;  
Number of obs.: 369, Care units: 115; Nursing homes: 64

**Table S5** Mixed linear regression model for dimension *social isolation* as dependent variable, the severity of each NPI-Q item defining the construct of agitation and the matching variables as fixed factors and care units nested in nursing homes as random factor

| Independent Variables (fixed effects)           | Coefficients | 95% CI              | SE          | t            | p                |
|-------------------------------------------------|--------------|---------------------|-------------|--------------|------------------|
| <b>(Intercept)</b>                              | <b>7.72</b>  | <b>5.44, 10.01</b>  | <b>1.18</b> | <b>6.54</b>  | <b>&lt;0.001</b> |
| <b>NPI-Q Severe Agitation/Aggression (yes)</b>  | <b>-1.47</b> | <b>-2.06, -0.88</b> | <b>0.30</b> | <b>-4.84</b> | <b>&lt;0.001</b> |
| <b>NPI-Q Severe Disinhibition (yes)</b>         | <b>-1.52</b> | <b>-2.32, -0.72</b> | <b>0.41</b> | <b>-3.69</b> | <b>&lt;0.001</b> |
| <b>NPI-Q Severe Irritability/Lability (yes)</b> | <b>-1.10</b> | <b>-1.78, -0.43</b> | <b>0.35</b> | <b>-3.16</b> | <b>0.002</b>     |
| Age                                             | -0.03        | -0.05, <0.01        | 0.01        | -1.85        | 0.065            |
| Sex (female)                                    | 0.13         | -0.37, 0.63         | 0.26        | 0.51         | 0.612            |
| Visits (no)                                     | 0.25         | -0.72, 1.21         | 0.50        | 0.50         | 0.619            |
| DSS score                                       | -0.04        | -0.12, 0.05         | 0.04        | -0.89        | 0.374            |
| Duration of stay                                | <0.01        | -0.01, 0.01         | <0.01       | 0.04         | 0.968            |
| NPI-Q Delusions (no)                            | 0.29         | -0.20, 0.78         | 0.25        | 1.14         | 0.253            |
| NPI-Q Anxiety (no)                              | 0.71         | 0.22, 1.20          | 0.25        | 2.83         | 0.005            |
| NPI-Q Aberrant Motor (no)                       | 0.35         | -0.17, 0.87         | 0.27        | 1.29         | 0.197            |
| NPI-Q Hallucinations (no)                       | 0.40         | -0.15, 0.95         | 0.29        | 1.41         | 0.161            |

Random effects: Care unit (intercept): Variance = 0.20; SD = 0.45; .sig01 = 0.00, 1.07;  
Nursing home (intercept): Variance = 0.57; SD = 0.75; .sig02 = 0.00, 1.16;  
Residual: Variance = 4.27; SD = 2.07; .sigma = 1.87, 2.21;  
Number of obs.: 369, Care units: 115; Nursing homes: 64
